# Supplementary material for: Chronic spinal cord injury attenuates influenza virus-specific antiviral immunity
Source: Springer Nature journal article supplement (doi:10.1186/s12974-016-0574-y), 2016-05-31
Supplement: MOESM1 [file 10244578]

**Table 1. Primer sequences for qRT PCR**

| <b>Gene</b>                     | <b>Forward Primer</b>       | <b>Reverse Primer</b>       | <b>T<sub>m</sub> (°C)</b> | <b>Product (bp)</b> |
|---------------------------------|-----------------------------|-----------------------------|---------------------------|---------------------|
| <b>IFN<math>\beta</math></b>    | 5'-ATGACGGAGAAGATGCAGAAGAGT | 5'-TCATCCAGGAGACGTACAACAATA | 52.3                      | 134                 |
| <b>IRF9</b>                     | 5'-AGAGCAGCATGGAGCAGGTGGAGT | 5'-ATGGGGCAAAGGCGCTGAACAAAG | 59.1                      | 136                 |
| <b>CCL2</b>                     | 5'-CCCCACTCACCTGCTGCTAC     | 5'-CCTGCTGCTGGTGATCCTCTT    | 52.9                      | 86                  |
| <b>CCL4</b>                     | 5'-GTGGCTGCCTTCTGTGCTC      | 5'-GATCTGTCTGCCTCTTTTGGTCA  | 55.6                      | 180                 |
| <b>CXCL10</b>                   | 5'-GCCGTCATTTTCTGCCTCCTCCT  | 5'-CTCATTCTCACTGGCCCGTCATC  | 57.2                      | 113                 |
| <b>M1</b>                       | 5'-AGCCGAGATCGCGCAGAGACT    | 5'-TGAGCGTGAACACAAATCCTAAAA | 53.4                      | 137                 |
| <b><math>\beta</math>-actin</b> | 5'-ATGGTGGGAATGGGTCAGA      | 5'-CACGCAGCTCATTGTAGAAGG    | 54.8                      | 157                 |
